# Supplementary material for: A Branched-Chain Amino Acid-Related Metabolic Signature Characterizes Obese Adolescents with Non-Alcoholic Fatty Liver Disease
Source: MDPI journal article supplement (doi:10.3390/nu9070642), 2017-06-22

**Table S1.** Characteristics of subjects who underwent a 2-step hyperinsulinemic-euglycemic clamp stratified by hepatic fat content (HFF).

|                                                     | <b>HFF &lt; 5.5% (n=7)</b>    | <b>HFF ≥ 5.5% (n=5)</b>       | <b>p</b>     |
|-----------------------------------------------------|-------------------------------|-------------------------------|--------------|
| <b>CLINICAL FEATURES</b>                            |                               |                               |              |
| Age (years)                                         | 15.3 ± 2.7                    | 13.9 ± 2.6                    | <b>0.40</b>  |
| Gender (M/F)                                        | 1/6 (14%/ 86%)                | 3/2 (60%/ 40%)                | <b>0.15</b>  |
| Race (Caucasian/African<br>American/Hispanic/Asian) | 3/4/0/0<br>(43% /75% /0% /0%) | 1/0/4/0<br>(20% /0% /80% /0%) | <b>0.01</b>  |
| Glucose tolerance (NGT/IGT)                         | 6/1 (86%/ 14%)                | 4/1 (80%/ 20%)                | <b>0.68</b>  |
| BMI (kg/m <sup>2</sup> )                            | 36.5 ± 5.4                    | 35.1 ± 5.3                    | <b>0.67</b>  |
| BMI z-score                                         | 2.3 ± 0.2                     | 2.4 ± 0.1                     | <b>0.22</b>  |
| Body Fat (%)                                        | 46.9 ± 4                      | 45.9 ± 4.8                    | <b>0.66</b>  |
| <b>GLUCOSE METABOLISM</b>                           |                               |                               |              |
| Fasting glucose (mg/dl)                             | 95 ± 6                        | 93 ± 7.6                      | <b>0.62</b>  |
| Fasting insulin (μU/ml)                             | 29.6 ± 12.4                   | 26.7 ± 7.6                    | <b>0.91</b>  |
| 2 h glucose (mg/dl)                                 | 116.7 ± 19.3                  | 122 ± 26.2                    | <b>0.69</b>  |
| Hemoglobin A <sub>1C</sub> (%)                      | 5.4 ± 0.33                    | 5.5 ± 0.3                     | <b>0.42</b>  |
| WBISI                                               | 2 ± 1.1                       | 1.9 ± 1.1                     | <b>0.91</b>  |
| IGI                                                 | 4.8 ± 3.1                     | 3.2 ± 0.8                     | <b>0.31</b>  |
| DI                                                  | 8.2 ± 4.8                     | 5.6 ± 2.1                     | <b>0.28</b>  |
| <b>LIPID PROFILE</b>                                |                               |                               |              |
| Total Cholesterol (mg/dL)                           | 158.2 ± 23                    | 194 ± 62                      | <b>0.21</b>  |
| HDL Cholesterol (mg/dL)                             | 42.7 ± 5.6                    | 47.2 ± 5.3                    | <b>0.20</b>  |
| LDL Cholesterol (mg/dL)                             | 93.7 ± 17.3                   | 121.6 ± 50.1                  | <b>0.23</b>  |
| Triglycerides (mg/dL)                               | 109.5 ± 59.6                  | 126.4 ± 85.2                  | <b>0.71</b>  |
| <b>LIVER FUNCTION</b>                               |                               |                               |              |
| Alanine Transaminase (U/L)                          | 13.3 ± 4.1                    | 21 ± 11.5                     | <b>0.16</b>  |
| Aspartate Transaminase (U/L)                        | 17.8 ± 2.6                    | 20.4 ± 3.1                    | <b>0.17</b>  |
| <b>BODY FAT COMPOSITION</b>                         |                               |                               |              |
| Visceral (cm <sup>2</sup> )                         | 74.7 ± 36.3                   | 83.4 ± 41.5                   | <b>0.71</b>  |
| Deep Subcutaneous (cm <sup>2</sup> )                | 223.7 ± 83                    | 209.9 ± 72.5                  | <b>0.77</b>  |
| Subcutaneous (cm <sup>2</sup> )                     | 631.7 ± 177                   | 574 ± 148.7                   | <b>0.57</b>  |
| Superficial Subcutaneous (cm <sup>2</sup> )         | 165.3 ± 49.2                  | 121.6 ± 41.3                  | <b>0.15</b>  |
| Deep/Superficial Subcutaneous                       | 1.3 ± 0.2                     | 1.7 ± 0.4                     | <b>0.05</b>  |
| Hepatic Fat Fraction (%)                            | 1.6 ± 2.1                     | 13 ± 7.4                      | <b>0.003</b> |

BMI, Body Mass Index; DI, Disposition Index; IGI, Insulinogenic index; NGT, Normal Glucose tolerance; IGT, Impaired Glucose Tolerance; WBISI, Whole Body Insulin Sensitivity Index. Statistical comparisons between the two groups were made by either Student's *t*-tests for continuous variables or Chi-square tests for categorical variables.

**Table S2.** Characteristics of subjects included in the longitudinal study at baseline and after a follow-up of 2.2±0.8 years.

|                                                  | Baseline (n=23)              | Follow-up (n=23) | <i>p</i>          |
|--------------------------------------------------|------------------------------|------------------|-------------------|
| <b>CLINICAL FEATURES</b>                         |                              |                  |                   |
| Age (years)                                      | 13.9 ± 2.8                   | 16.3 ± 2.9       | <b>&lt;0.0001</b> |
| Gender (M/F)                                     | 9/14 (40%/ 60%)              | -                | -                 |
| Race (Caucasian/African American/Hispanic/Asian) | 10/7/6/0 (44%/ 30%/ 26%/ 0%) | -                | -                 |
| Glucose tolerance (NGT/IGT)                      | 21/2 (91%/ 9%)               | 22/1 (95%/ 5%)   | <b>0.55</b>       |
| BMI (kg/m <sup>2</sup> )                         | 35.4 ± 6.6                   | 38.3 ± 6.3       | <b>0.0003</b>     |
| BMI z-score                                      | 2.3 ± 0.3                    | 2.3 ± 0.3        | <b>0.68</b>       |
| Body Fat (%)                                     | 43.7 ± 7.1                   | 44.0 ± 6.0       | <b>0.67</b>       |
| <b>GLUCOSE METABOLISM</b>                        |                              |                  |                   |
| Fasting glucose (mg/dl)                          | 93.1 ± 6.5                   | 91.1 ± 8.0       | <b>0.27</b>       |
| Fasting insulin (μU/ml)                          | 34.7 ± 20.5                  | 37.2 ± 22.8      | <b>0.49</b>       |
| 2 h glucose (mg/dl)                              | 110 ± 20                     | 109 ± 18         | <b>0.72</b>       |
| Hemoglobin A <sub>1C</sub> (%)                   | 5.5 ± 0.3                    | 5.5 ± 0.2        | <b>0.73</b>       |
| WBISI                                            | 2.0 ± 1.1                    | 1.8 ± 0.9        | <b>0.31</b>       |
| IGI                                              | 5.6 ± 6.3                    | 5.1 ± 3.0        | <b>0.61</b>       |
| DI                                               | 8.8 ± 7.9                    | 7.7 ± 4.2        | <b>0.39</b>       |
| <b>LIPID PROFILE</b>                             |                              |                  |                   |
| Total Cholesterol (mg/dL)                        | 156.0 ± 26.8                 | 145.3 ± 16.2     | <b>0.14</b>       |
| HDL Cholesterol (mg/dL)                          | 44.7 ± 9.5                   | 43.9 ± 12.9      | <b>0.84</b>       |
| LDL Cholesterol (mg/dL)                          | 93.5 ± 22.5                  | 83.2 ± 13.1      | <b>0.09</b>       |
| Triglycerides (mg/dL)                            | 88.9 ± 47.3                  | 86.8 ± 52.3      | <b>0.87</b>       |
| <b>LIVER FUNCTION</b>                            |                              |                  |                   |
| Alanine Transaminase (U/L)                       | 22.1 ± 19.7                  | 23.5 ± 17.3      | <b>0.36</b>       |
| Aspartate Transaminase (U/L)                     | 23.0 ± 9.3                   | 23.5 ± 10.7      | <b>0.85</b>       |
| <b>BODY FAT COMPOSITION</b>                      |                              |                  |                   |
| Visceral (cm <sup>2</sup> )                      | 63.4 ± 28.5                  | 69.1 ± 36.1      | <b>0.28</b>       |
| Deep Subcutaneous (cm <sup>2</sup> )             | 197 ± 77                     | 195 ± 67         | <b>0.86</b>       |
| Subcutaneous (cm <sup>2</sup> )                  | 565 ± 175                    | 553 ± 203        | <b>0.77</b>       |
| Superficial Subcutaneous (cm <sup>2</sup> )      | 158 ± 56                     | 175 ± 65         | <b>0.68</b>       |
| Deep/Superficial Subcutaneous                    | 1.3 ± 0.3                    | 1.7 ± 0.5        | <b>0.17</b>       |
| Hepatic Fat Fraction (%)                         | 5.3 ± 10.0                   | 7.1 ± 11.5       | <b>0.02</b>       |

BMI, Body Mass Index; DI, Disposition Index; IGI, Insulinogenic index; NGT, Normal Glucose tolerance; IGT, Impaired Glucose Tolerance; WBISI, Whole Body Insulin Sensitivity Index. Statistical comparisons between the two groups were made by either Student's *t*-tests for continuous variables or Chi-square tests for categorical variables.

**Table S3.** Comparisons between the characteristics of the whole study population ( $n=78$ ) and the two subgroups of subjects who underwent the hyperinsulinemic-euglycemic clamp or the follow-up examination.

|                                                     | Clamp group<br>All<br>( $n=23$ ) | Clamp group<br>HFF < 5.5%<br>( $n=17$ ) | Clamp group<br>HFF $\geq$ 5.5%<br>( $n=6$ ) | Follow-up group<br>All<br>( $n=12$ ) |
|-----------------------------------------------------|----------------------------------|-----------------------------------------|---------------------------------------------|--------------------------------------|
|                                                     | <i>p</i>                         | <i>p</i>                                | <i>p</i>                                    | <i>p</i>                             |
| <b>CLINICAL FEATURES</b>                            |                                  |                                         |                                             |                                      |
| Age (years)                                         | 0.23                             | 0.43                                    | 0.47                                        | 0.16                                 |
| Gender (M/F)                                        | 0.48                             | 0.87                                    | 0.77                                        | 0.37                                 |
| Race (Caucasian/African<br>American/Hispanic/Asian) | 0.51                             | 0.66                                    | 0.61                                        | 0.98                                 |
| Glucose tolerance (NGT/IGT)                         | 0.41                             | 0.42                                    | 0.77                                        | 0.88                                 |
| BMI ( $\text{kg}/\text{m}^2$ )                      | 0.34                             | 0.83                                    | 0.35                                        | 0.27                                 |
| BMI $z$ -score                                      | 0.79                             | 0.87                                    | 0.59                                        | 0.99                                 |
| Body Fat (%)                                        | 0.73                             | 0.25                                    | 0.86                                        | 0.35                                 |
| <b>GLUCOSE METABOLISM</b>                           |                                  |                                         |                                             |                                      |
| Fasting glucose (mg/dl)                             | 0.37                             | 0.50                                    | 0.29                                        | 0.42                                 |
| Fasting insulin ( $\mu\text{U}/\text{ml}$ )         | 0.90                             | 0.55                                    | 0.71                                        | 0.78                                 |
| 2 h glucose (mg/dl)                                 | 0.21                             | 0.06                                    | 0.95                                        | 0.77                                 |
| Hemoglobin A <sub>1C</sub> (%)                      | 0.70                             | 0.84                                    | 0.64                                        | 0.98                                 |
| WBISI                                               | 0.59                             | 0.64                                    | 0.83                                        | 0.77                                 |
| IGI                                                 | 0.84                             | 0.98                                    | 0.66                                        | 0.56                                 |
| DI                                                  | 0.33                             | 0.52                                    | 0.64                                        | 0.79                                 |
| <b>LIPID PROFILE</b>                                |                                  |                                         |                                             |                                      |
| Total Cholesterol (mg/dL)                           | 0.60                             | 0.47                                    | 0.75                                        | 0.18                                 |
| HDL Cholesterol (mg/dL)                             | 0.92                             | 0.20                                    | 0.31                                        | 0.84                                 |
| LDL Cholesterol (mg/dL)                             | 0.52                             | 0.42                                    | 0.75                                        | 0.24                                 |
| Triglycerides (mg/dL)                               | 0.64                             | 0.12                                    | 0.43                                        | 0.38                                 |
| <b>LIVER FUNCTION</b>                               |                                  |                                         |                                             |                                      |
| Alanine Transaminase (U/L)                          | 0.17                             | 0.90                                    | 0.40                                        | 0.10                                 |
| Aspartate Transaminase (U/L)                        | 0.57                             | 0.47                                    | 0.62                                        | 0.12                                 |
| <b>BODY FAT COMPOSITION</b>                         |                                  |                                         |                                             |                                      |
| Visceral ( $\text{cm}^2$ )                          | 0.89                             | 0.67                                    | 0.57                                        | 0.29                                 |
| Deep Subcutaneous ( $\text{cm}^2$ )                 | 0.23                             | 0.35                                    | 0.35                                        | 0.08                                 |
| Subcutaneous ( $\text{cm}^2$ )                      | 0.45                             | 0.55                                    | 0.64                                        | 0.20                                 |
| Superficial Subcutaneous ( $\text{cm}^2$ )          | 0.61                             | 0.97                                    | 0.95                                        | 0.88                                 |
| Deep/Superficial Subcutaneous                       | 0.54                             | 0.37                                    | 0.43                                        | 0.054                                |
| Hepatic Fat Fraction (%)                            | 0.26                             | 0.61                                    | 0.83                                        | 0.76                                 |

BMI, Body Mass Index; DI, Disposition Index; IGI, Insulinogenic index; NGT, Normal Glucose tolerance; IGT, Impaired Glucose Tolerance; WBISI, Whole Body Insulin Sensitivity Index. Statistical comparisons between groups were made by either Student's  $t$ -tests or Wilcoxon test for continuous variables and by Chi-square test for categorical variables as appropriate.

**Table S4.** List and abbreviations of the analyzed metabolites.

| Abbreviation          | Full biochemical name              |
|-----------------------|------------------------------------|
| <b>AMINO ACIDS</b>    |                                    |
| Ala                   | Alanine                            |
| Arg                   | Arginine                           |
| Asn                   | Asparagine                         |
| Asp                   | Aspartic acid                      |
| Cys                   | Cysteine                           |
| Gln                   | Glutamine                          |
| Glu                   | Glutamic acid                      |
| Gly                   | Glycine                            |
| His                   | Histidine                          |
| Ile                   | Isoleucine                         |
| Leu                   | Leucine                            |
| Lys                   | Lysine                             |
| Met                   | Methionine                         |
| Orn                   | Ornithine                          |
| Phe                   | Phenylalanine                      |
| Pro                   | Proline                            |
| Ser                   | Serine                             |
| Thr                   | Threonine                          |
| Trp                   | Tryptophan                         |
| Tyr                   | Tyrosine                           |
| Val                   | Valine                             |
| Met-SO                | Methionine Sulfoxide               |
| total DMA             | Total Dimethylamine                |
| <b>ACYLCARNITINES</b> |                                    |
| C0                    | DL-Carnitine                       |
| C10                   | Decanoyl-L-carnitine               |
| C10:1                 | Decenoyl-L-carnitine               |
| C10:2                 | Decadienyl-L-carnitine             |
| C12                   | Dodecanoyl-L-carnitine             |
| C12-DC                | Dodecanedioyl-L-carnitine          |
| C12:1                 | Dodecenoyl-L-carnitine             |
| C14                   | Tetradecanoyl-L-carnitine          |
| C14:1                 | Tetradecenoyl-L-carnitine          |
| C14:1-OH              | Hydroxytetradecenoyl-L-carnitine   |
| C14:2                 | Tetradecadienyl-L-carnitine        |
| C14:2-OH              | Hydroxytetradecadienyl-L-carnitine |
| C16                   | Hexadecanoyl-L-carnitine           |
| C16-OH                | Hydroxyhexadecanoyl-L-carnitine    |
| C16:1                 | Hexadecenoyl-L-carnitine           |
| C16:1-OH              | Hydroxyhexadecenoyl-L-carnitine    |
| C16:2                 | Hexadecadienyl-L-carnitine         |
| C16:2-OH              | Hydroxyhexadecadienyl-L-carnitine  |
| C18                   | Octadecanoyl-L-carnitine           |

---

|                 |                                                        |
|-----------------|--------------------------------------------------------|
| C18:1           | Octadecenoyl-L-carnitine                               |
| C18:1-OH        | Hydroxyoctadecenoyl-L-carnitine                        |
| C18:2           | Octadecadienyl-L-carnitine                             |
| C2              | Acetyl-L-carnitine                                     |
| C3              | Propionyl-L-carnitine                                  |
| C3-DC (C4-OH)   | Malonyl-L-carnitine / Hydroxybutyryl-L-carnitine       |
| C3-OH           | Hydroxypropionyl-L-carnitine                           |
| C3:1            | Propenyl-L-carnitine                                   |
| C4              | Butyryl-L-carnitine                                    |
| C4:1            | Butenyl-L-carnitine                                    |
| C5              | Valeryl-L-carnitine                                    |
| C5-DC (C6-OH)   | Glutaryl-L-carnitine / Hydroxyhexanoyl-L-carnitine     |
| C5-M-DC         | Methylglutaryl-L-carnitine                             |
| C5-OH (C3-DC-M) | Methylmalonyl-L-carnitine / Hydroxyvaleryl-L-carnitine |
| C5:1            | Tiglyl-L-carnitine                                     |
| C5:1-DC         | Glutaconyl-L-carnitine                                 |
| C6 (C4:1-DC)    | Glutaryl-L-carnitine / Hydroxyhexanoyl-L-carnitine     |
| C6:1            | Hexenoyl-L-carnitine                                   |
| C7-DC           | Pimelyl-L-carnitine                                    |
| C8              | Octanoyl-L-carnitine                                   |
| C9              | Nonayl-L-carnitine                                     |

---

#### **LYSOPHOSPHATIDYLCHOLINES**

|                |                                    |
|----------------|------------------------------------|
| lysoPC a C14:0 | Lysophosphatidylcholine acyl C14:0 |
| lysoPC a C16:0 | Lysophosphatidylcholine acyl C16:0 |
| lysoPC a C16:1 | Lysophosphatidylcholine acyl C16:1 |
| lysoPC a C17:0 | Lysophosphatidylcholine acyl C17:0 |
| lysoPC a C18:0 | Lysophosphatidylcholine acyl C18:0 |
| lysoPC a C18:1 | Lysophosphatidylcholine acyl C18:1 |
| lysoPC a C18:2 | Lysophosphatidylcholine acyl C18:2 |
| lysoPC a C20:3 | Lysophosphatidylcholine acyl C20:3 |
| lysoPC a C20:4 | Lysophosphatidylcholine acyl C20:4 |
| lysoPC a C24:0 | Lysophosphatidylcholine acyl C24:0 |
| lysoPC a C26:0 | Lysophosphatidylcholine acyl C26:0 |
| lysoPC a C26:1 | Lysophosphatidylcholine acyl C26:1 |
| lysoPC a C28:0 | Lysophosphatidylcholine acyl C28:0 |
| lysoPC a C28:1 | Lysophosphatidylcholine acyl C28:1 |

---

#### **DIACYL PHOSPHATIDYLCHOLINES**

|             |                                  |
|-------------|----------------------------------|
| PC aa C24:0 | Phosphatidylcholine diacyl C24:0 |
| PC aa C26:0 | Phosphatidylcholine diacyl C26:0 |
| PC aa C28:1 | Phosphatidylcholine diacyl C28:1 |
| PC aa C30:0 | Phosphatidylcholine diacyl C30:0 |
| PC aa C30:2 | Phosphatidylcholine diacyl C30:2 |
| PC aa C32:0 | Phosphatidylcholine diacyl C32:0 |
| PC aa C32:1 | Phosphatidylcholine diacyl C32:1 |
| PC aa C32:2 | Phosphatidylcholine diacyl C32:2 |
| PC aa C32:3 | Phosphatidylcholine diacyl C32:3 |
| PC aa C34:1 | Phosphatidylcholine diacyl C34:1 |

---

---

|             |                                  |
|-------------|----------------------------------|
| PC aa C34:2 | Phosphatidylcholine diacyl C34:2 |
| PC aa C34:3 | Phosphatidylcholine diacyl C34:3 |
| PC aa C34:4 | Phosphatidylcholine diacyl C34:4 |
| PC aa C36:0 | Phosphatidylcholine diacyl C36:0 |
| PC aa C36:1 | Phosphatidylcholine diacyl C36:1 |
| PC aa C36:2 | Phosphatidylcholine diacyl C36:2 |
| PC aa C36:3 | Phosphatidylcholine diacyl C36:3 |
| PC aa C36:4 | Phosphatidylcholine diacyl C36:4 |
| PC aa C36:5 | Phosphatidylcholine diacyl C36:5 |
| PC aa C36:6 | Phosphatidylcholine diacyl C36:6 |
| PC aa C38:0 | Phosphatidylcholine diacyl C38:0 |
| PC aa C38:1 | Phosphatidylcholine diacyl C38:1 |
| PC aa C38:3 | Phosphatidylcholine diacyl C38:3 |
| PC aa C38:4 | Phosphatidylcholine diacyl C38:4 |
| PC aa C38:5 | Phosphatidylcholine diacyl C38:5 |
| PC aa C38:6 | Phosphatidylcholine diacyl C38:6 |
| PC aa C40:1 | Phosphatidylcholine diacyl C40:1 |
| PC aa C40:2 | Phosphatidylcholine diacyl C40:2 |
| PC aa C40:3 | Phosphatidylcholine diacyl C40:3 |
| PC aa C40:4 | Phosphatidylcholine diacyl C40:4 |
| PC aa C40:5 | Phosphatidylcholine diacyl C40:5 |
| PC aa C40:6 | Phosphatidylcholine diacyl C40:6 |
| PC aa C42:0 | Phosphatidylcholine diacyl C42:0 |
| PC aa C42:1 | Phosphatidylcholine diacyl C42:1 |
| PC aa C42:2 | Phosphatidylcholine diacyl C42:2 |
| PC aa C42:4 | Phosphatidylcholine diacyl C42:4 |
| PC aa C42:5 | Phosphatidylcholine diacyl C42:5 |
| PC aa C42:6 | Phosphatidylcholine diacyl C42:6 |

---

#### **ACYL-ALKYL PHOSPHATIDYLCHOLINES**

|             |                                      |
|-------------|--------------------------------------|
| PC ae C30:0 | Phosphatidylcholine acyl-alkyl C30:0 |
| PC ae C30:1 | Phosphatidylcholine acyl-alkyl C30:1 |
| PC ae C30:2 | Phosphatidylcholine acyl-alkyl C30:2 |
| PC ae C32:1 | Phosphatidylcholine acyl-alkyl C32:1 |
| PC ae C32:2 | Phosphatidylcholine acyl-alkyl C32:2 |
| PC ae C34:0 | Phosphatidylcholine acyl-alkyl C34:0 |
| PC ae C34:1 | Phosphatidylcholine acyl-alkyl C34:1 |
| PC ae C34:2 | Phosphatidylcholine acyl-alkyl C34:2 |
| PC ae C34:3 | Phosphatidylcholine acyl-alkyl C34:3 |
| PC ae C36:0 | Phosphatidylcholine acyl-alkyl C36:0 |
| PC ae C36:1 | Phosphatidylcholine acyl-alkyl C36:1 |
| PC ae C36:2 | Phosphatidylcholine acyl-alkyl C36:2 |
| PC ae C36:3 | Phosphatidylcholine acyl-alkyl C36:3 |
| PC ae C36:4 | Phosphatidylcholine acyl-alkyl C36:4 |
| PC ae C36:5 | Phosphatidylcholine acyl-alkyl C36:5 |
| PC ae C38:0 | Phosphatidylcholine acyl-alkyl C38:0 |
| PC ae C38:1 | Phosphatidylcholine acyl-alkyl C38:1 |
| PC ae C38:2 | Phosphatidylcholine acyl-alkyl C38:2 |
| PC ae C38:3 | Phosphatidylcholine acyl-alkyl C38:3 |

---

---

|             |                                      |
|-------------|--------------------------------------|
| PC ae C38:4 | Phosphatidylcholine acyl-alkyl C38:4 |
| PC ae C38:5 | Phosphatidylcholine acyl-alkyl C38:5 |
| PC ae C38:6 | Phosphatidylcholine acyl-alkyl C38:6 |
| PC ae C40:1 | Phosphatidylcholine acyl-alkyl C40:1 |
| PC ae C40:2 | Phosphatidylcholine acyl-alkyl C40:2 |
| PC ae C40:3 | Phosphatidylcholine acyl-alkyl C40:3 |
| PC ae C40:4 | Phosphatidylcholine acyl-alkyl C40:4 |
| PC ae C40:5 | Phosphatidylcholine acyl-alkyl C40:5 |
| PC ae C40:6 | Phosphatidylcholine acyl-alkyl C40:6 |
| PC ae C42:0 | Phosphatidylcholine acyl-alkyl C42:0 |
| PC ae C42:1 | Phosphatidylcholine acyl-alkyl C42:1 |
| PC ae C42:2 | Phosphatidylcholine acyl-alkyl C42:2 |
| PC ae C42:3 | Phosphatidylcholine acyl-alkyl C42:3 |
| PC ae C42:4 | Phosphatidylcholine acyl-alkyl C42:4 |
| PC ae C42:5 | Phosphatidylcholine acyl-alkyl C42:5 |
| PC ae C44:3 | Phosphatidylcholine acyl-alkyl C44:3 |
| PC ae C44:4 | Phosphatidylcholine acyl-alkyl C44:4 |
| PC ae C44:5 | Phosphatidylcholine acyl-alkyl C44:5 |
| PC ae C44:6 | Phosphatidylcholine acyl-alkyl C44:6 |

---

#### **SPHINGOMYELINS**

|               |                            |
|---------------|----------------------------|
| SM (OH) C14:1 | Hydroxysphingomyelin C14:1 |
| SM (OH) C16:1 | Hydroxysphingomyelin C16:1 |
| SM (OH) C22:1 | Hydroxysphingomyelin C22:1 |
| SM (OH) C22:2 | Hydroxysphingomyelin C22:2 |
| SM (OH) C24:1 | Hydroxysphingomyelin C24:1 |
| SM C16:0      | Sphingomyelin C16:0        |
| SM C16:1      | Sphingomyelin C16:1        |
| SM C18:0      | Sphingomyelin C18:0        |
| SM C18:1      | Sphingomyelin C18:1        |
| SM C20:2      | Sphingomyelin C20:2        |
| SM C22:3      | Sphingomyelin C22:3        |
| SM C24:0      | Sphingomyelin C24:0        |
| SM C24:1      | Sphingomyelin C24:1        |
| SM C26:0      | Sphingomyelin C26:0        |
| SM C26:1      | Sphingomyelin C26:1        |

---

#### **SUGARS**

|    |        |
|----|--------|
| H1 | Hexose |
|----|--------|

---





**Figure S2.** Correlation between metabolites.

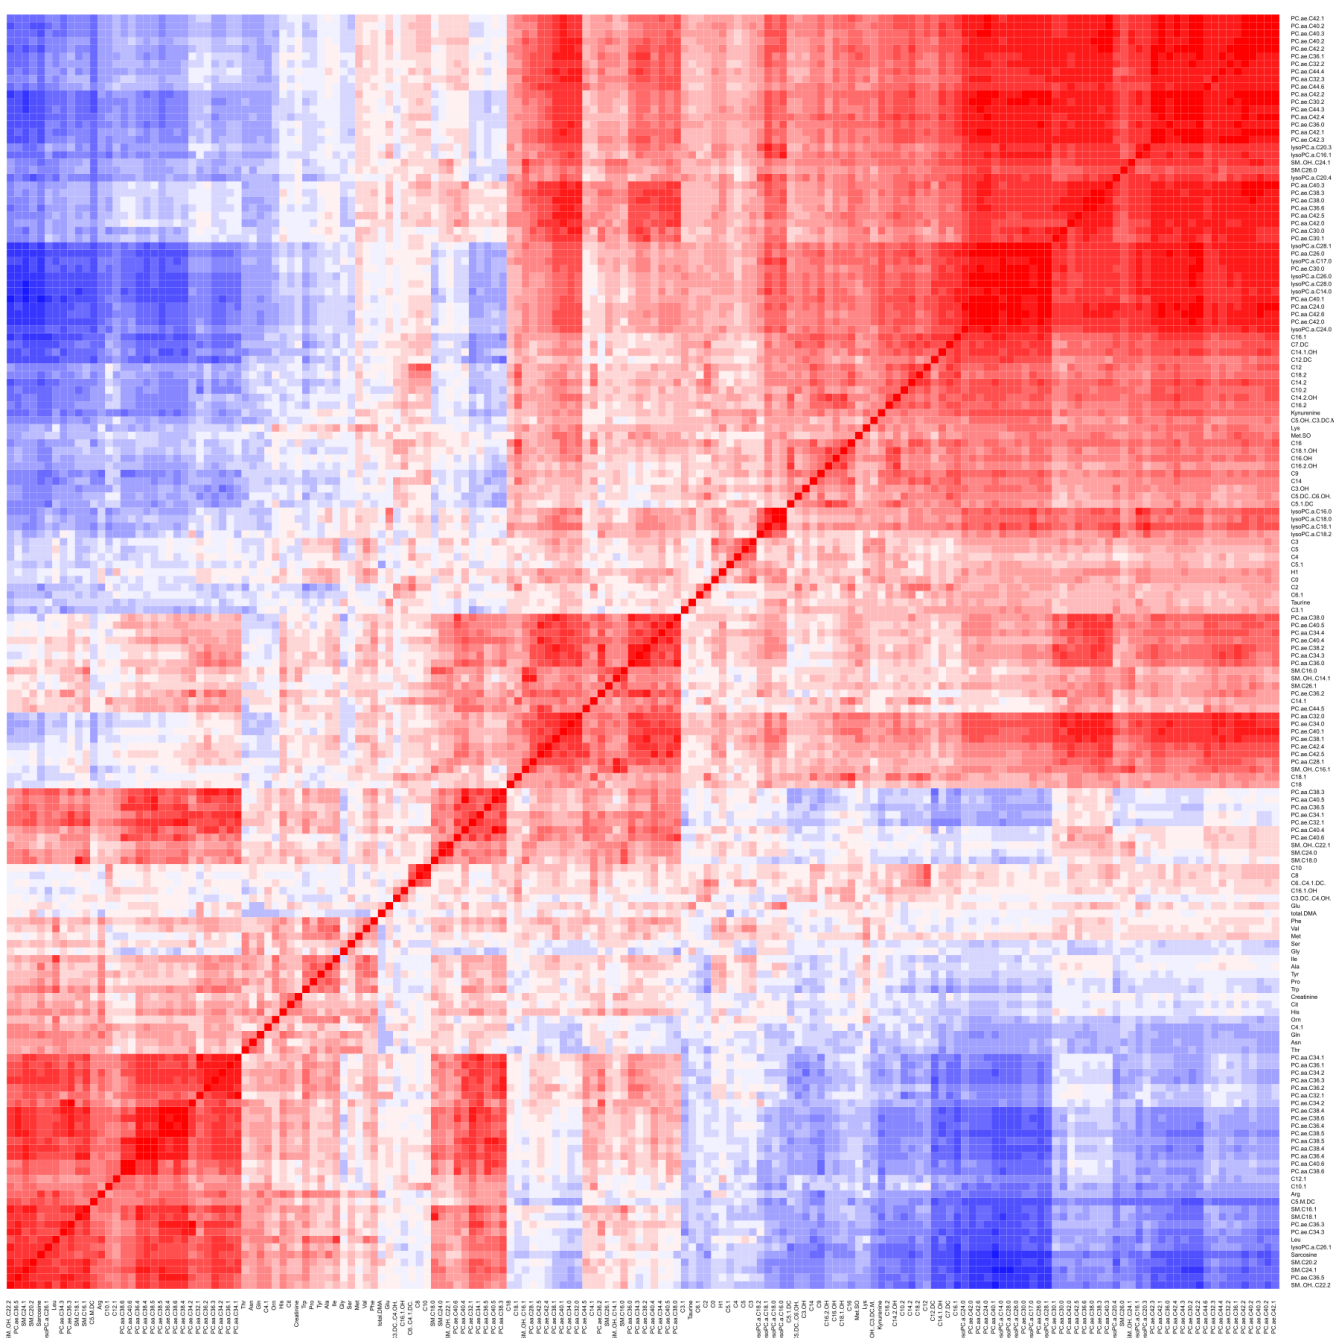

**Figure S3.** Percentage of variation for the first 9 principal components.

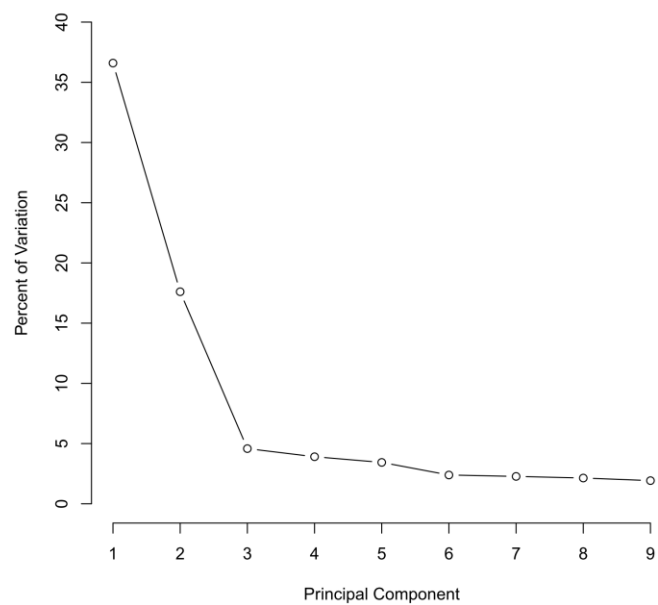

**Figure S4.** Score plot for the first 9 principal components.

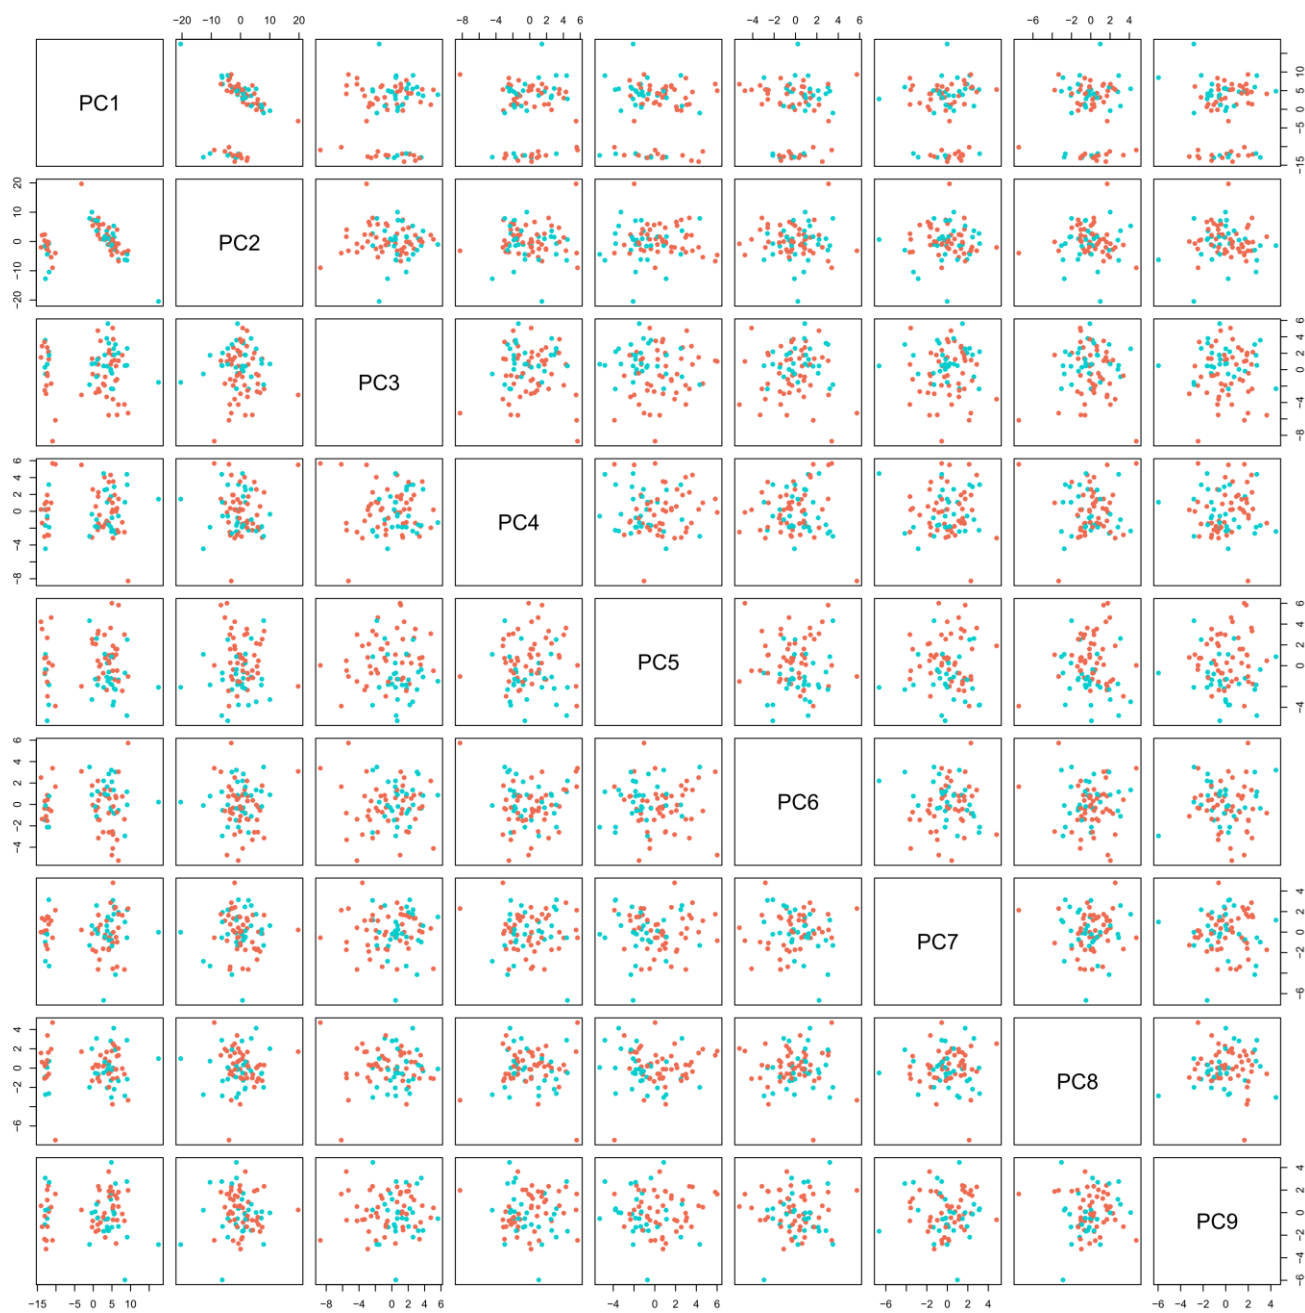

Supplement: s1 [file s1]
